# Supplementary material for: Fasting prevents hypoxia-induced defects of proteostasis in C. elegans
Source: PLoS Genet. 2019 Jun 27;15(6):e1008242. doi: 10.1371/journal.pgen.1008242 (PMC6619831; doi:10.1371/journal.pgen.1008242)
Supplement: S6 Table — (XLSX) [file pgen.1008242.s013.xlsx]

## Sheet: Sheet1
Iranon et al. Table S6
Supplemental Table 6a. Summary of experiments in Supplemental figure 6A
	Room air			Hypoxia fed				Room Air Fasted				Hypoxia fasted
Strain	mean #YFP foci	SD	n	mean #YFP foci	SD	n	p-value	mean #YFP foci	SD	n	p-value	mean #YFP foci	SD	n	p-value
Q40::YFP (AM141)	11.9524	7.18663	21	37.2381	8.63079	21	a,c,d	6.52381	2.4417	21	b	4.66667	3.13581	21	a,b
Q40::YFP (AM141)	15.8	6.81793	20	33	7.31257	20	a,c,d	9.3	5.31235	20	b	7.45	5.29623	20	a,b
Q40::YFP (AM141)	9.57143	4.11791	21	33.5238	6.59256	21	a,c,d	4.47619	1.93956	21	b	4.47619	3.9827	21	a,b
Significant differences (p < 0.05) in aggregation between conditions are indicated by letters above each group as follows: a - significantly different from room air controls; b - significantly different from fed hypoxic controls; c - significantly different from fasted hypoxic controls; d - significantly different from room air hypoxic controls
Supplemental Table 6b. Summary statistics for replicates for experiment in Supplemental figure 6B
	Room air fed			Room air fasted
Hours post hypoxia	mean #YFP foci	SD	n	mean #YFP foci	SD	n
0	1.73684	1.53623	20	3.1	2.16564	20
24	8.89474	3.38526	20	12.65	4.38492	20
48	16.1579	4.30436	20	16.4	3.49857	20
	Room air fed			Room air fasted
Hours post hypoxia	mean #YFP foci	SD	n	mean #YFP foci	SD	n
0	1	0.920598	20	4.95	2.61677	20
24	7.26316	3.14006	20	13.2	5.17301	20
48	21.1579	5.29056	20	15.65	4.76734	20
	Room air fed			Room air fasted
Hours post hypoxia	mean #YFP foci	SD	n	mean #YFP foci	SD	n
0	1.21053	1.16619	20	3.1	1.78606	20
24	10.9474	3.28786	20	12.25	3.4623	20
48	23.8421	5.05247	20	19.15	5.53421	20
Supplemental Table 6c. Summary statistics for replicate experiments Supplemental figure 6C
Strain	Condition (24 hours at L1)	Median onset of paralysis (days)	n	p-value
Q40::YFP(rmls133)	Room air fed	12.5	32
Q40::YFP(rmls133)	Room air fasted	14	43	*
Q40::YFP(rmls133)	Room air fed	18	56
Q40::YFP(rmls133)	Room air fasted	17	41	ns
p-value: ns > 0.05, * < 0.05, ** < 0.01, *** < 0.001, **** < 0.0001
